# Supplementary material
Source: PubMed Central journal article supplement (PMC7092908)
Supplement: mmc4.pdf [file mmc4.pdf]

# Table S1

**Table S1.** Sequences of synthetic DNA oligonucleotides used in this study for constructing siRNA validation system

| Name     | Synthetic DNA oligonucleotides                                                                                                                                        |
|----------|-----------------------------------------------------------------------------------------------------------------------------------------------------------------------|
| siEGFP   | 5'-AGCTCAAAAAGCAAGCTGACCCGAAAGTTCTTTTAA<br>GTTTTTCGTTTCGACTGGGACTTCAAGAAAAATCTAG-5'                                                                                   |
| shEGFP   | 5'-GATCCCCCGAAGCTGACCCGAAAGTTCTtcaagagaGAACCTCAGGGTCAGCTTGCTTTTTGGAAA<br>GGGCGTTTCGACTGGGACTTCAAGaagtctctctCTTGAAAGTCCAGTCGAACAAAAACCTTTTCGA-5'                       |
| siLuc    | 5'-AGCTCAAAAAGACATCACTTACGCTGAGTACTTCGATTTTAA<br>GTTTTTCTGTAGTGAATGCGACTCATGAAGCTAAAAATCTAG-5'                                                                        |
| shLuc    | 5'-GATCCCCGACATCACTTACGCTGAGTACTTCGAttcaagagaTCGAAGTACTCAGCGTAAGTGTGCTTTTTGGAAA<br>GGGCTGTAGTGAATGCGACTCATGAAGCTaagtctctctAGCTTCATGAGTCGCATTCACTACAGAAAAACCTTTTCGA-5' |
| sisAg1   | 5'-AGCTCAAAAACCTGCACGACTCCTGCTCAATTTTTAA<br>GTTTTTGGACGTGCTGAGGACGAGTAAAAATCTAG-5'                                                                                    |
| shsAg1   | 5'-GATCCCCCTGCACGACTCCTGCTCAttcaagagaTGAGCAGGAGTCGTGCAGGTTTTTGGAAA<br>GGGGACGTGCTGAGGACGAGT aagtctctctACTCGTCCCTCAGCACGTCCAAAAACCTTTTCGA-5'                           |
| sisAg3   | 5'-AGCTCAAAAAGGTATGTTGCCCGTTTGTCTTTTTAA<br>GTTTTTCCATACAACGGGCAACAGAAAAATCTAG-5'                                                                                      |
| shsAg3   | 5'-GATCCCCGGTATGTTGCCCGTTTGTCTtcaagagaGACAAACGGGCAACATACCTTTTTGGAAA<br>GGGCATACAACGGGCAACAGaagtctctctCTGTTGCCCGTGTATGAAAAACCTTTTCGA-5'                                |
| sip53    | 5'-AGCTCAAAAAGACTCCAGTGGTAATCTACTTTTTAA<br>GTTTTTCTGAGTCCACCATTAGATGAAAAATCTAG-5'                                                                                     |
| shp53    | 5'-GATCCCCGACTCCAGTGGTAATCTACTtcaagagaGTAGATTACCCTGGAGTCTTTTTGGAAA<br>GGGCTGAGGTCACCATTAGATG aagtctctctCATCTAATGGTGACCTCAGAAAAACCTTTTCGA-5'                           |
| siMat3   | 5'-AGCTCAAAAAGAATTGTCCCTACAGAATTTTTTAA<br>GTTTTTCTTAACAGTGGATGCTTAAAAATCTAG-5'                                                                                        |
| shMat3   | 5'-GATCCCCGAATTGTCCCTACAGAAttcaagagaATTCTGTAGGTGACAATCTTTTTGGAAA<br>GGGCTTAACAGTGGATGCTTAAaagtctctctTAAGACATCCACTGTTAAGAAAAACCTTTTCGA-5'                              |
| siMat6   | 5'-AGCTCAAAAAGGCATTTCAGAAGTTATATGTTTTTAA<br>GTTTTTCCGTAAGTCTTCAATATACAAAAATCTAG-5'                                                                                    |
| shMat6   | 5'-GATCCCCGCATTTCAGAAGTTATATGtcaagagaCATATAACTTCTGAATGCCTTTTTGGAAA<br>GGGCGTAAGTCTTCAATATACAaagtctctctGTATATTGAAGACTTACGAAAAACCTTTTCGA-5'                             |
| siLMP1-2 | 5'-AGCTCAAAAAGACACCACCTGCTCGTGTGTTTTTAA<br>GTTTTTCTGTGTGGACGAGCACTCAAAAAATCTAG-5'                                                                                     |
| shLMP1-2 | 5'-GATCCCCGACACCACCTGCTCGTGTGtcaagagaCTCAGGACAGGTGGTGTCTTTTTGGAAA<br>GGGCTGTGTGGACGAGCACTCaagtctctctGAGTGTCTGCCACCACAGAAAAACCTTTTCGA-5'                               |
| siLMP1-4 | 5'-AGCTCAAAAAGTTCAGCTAAGCTACTATGTTTTTAA<br>GTTTTTCAAGTCGATTCGATGATACAAAAATCTAG-5'                                                                                     |
| shLMP1-4 | 5'-GATCCCCGTTTCAGCTAAGCTACTATGtcaagagaCATAGTAGCTTAGCTGAACTTTTTGGAAA<br>GGGCAAGTCGATTCGATGATACaagtctctctGTATCATCGAATCGACTTAAAAACCTTTTCGA-5'                            |
| siAKT1-1 | 5'-AGCTCAAAAAGCGACGTGGCTATTGTGAATTTTTAA<br>GTTTTTCTGCTGCACCGATAACACTTAAAAATCTAG-5'                                                                                    |
| siAKT1-2 | 5'-AGCTCAAAAACGCTACTTCTCTCAAGATTTTTTAA<br>GTTTTTTCGATGAAGGAGGAGTTCTAAAAATCTAG-5'                                                                                      |
| siAKT1-3 | 5'-AGCTCAAAAACCTTCTCTCAAGAATGATTTTTTAA<br>GTTTTTGAAGGAGGAGTTCTTACTAAAAATCTAG-5'                                                                                       |
| siAKT1-4 | 5'-AGCTCAAAAAGTGGACCACTGTCTATCGAATTTTTAA<br>GTTTTTCACTGGTGACAGTAGCTTAAAAATCTAG-5'                                                                                     |
| siAKT1-5 | 5'-AGCTCAAAAACACCACCTGACCAAGATGATTTTTAA<br>GTTTTTGTGGTGGACTGGTCTACTAAAAATCTAG-5'                                                                                      |

To construct this reporter-based siRNA validation system, two complementary sense- and antisense-oligonucleotides were annealed to form a short synthetic DNA fragment with two unique restriction enzyme *Hind*III and *Bgl*II compatible ends, which could be used to insert into the *Hind*III/*Bgl*II-digested targeting reporter and triggering siRNA expression vectors simultaneously.
